# Supplementary material for: Purified Inactivated Zika Vaccine Candidates Afford Protection against Lethal Challenge in Mice
Source: PubMed Central journal article supplement (PMC6220238; doi:10.1038/s41598-018-34735-7), 2018-11-07
Supplement: 41598_2018_34735_MOESM1_ESM.pdf [file 41598_2018_34735_MOESM1_ESM.pdf]

## **Purified Inactivated Zika Vaccine Candidates Afford Protection against Lethal Challenge in Mice**

Whitney R. Baldwin<sup>1,2†</sup>, Jill A. Livengood<sup>1†\*</sup>, Holli A. Giebler<sup>1,2</sup>, Janae L. Stovall<sup>2</sup>, Karen L. Boroughs<sup>2</sup>, Stephanie Sonnberg<sup>1</sup>, Kelly J. Bohning<sup>1</sup>, Elizabeth A. Dietrich<sup>2</sup>, Yee Tsuey Ong<sup>2</sup>, Hoang K. Danh<sup>1</sup>, Hetal K. Patel<sup>1</sup>, Claire Y.H. Huang<sup>2\*</sup>, Hansi J. Dean<sup>1</sup>

<sup>1</sup> Takeda Vaccines Inc, Cambridge, MA, USA

<sup>2</sup> Arboviral Diseases Branch, Division of Vector-Borne Diseases, Centers for Disease Control and Prevention, Fort Collins, Colorado, USA

†Contributed equally.

\*Correspondence and request for materials should be addressed to J.A.L. (jill.livengood@takeda.com) and C.Y-H.H. (yxh0@cdc.gov)

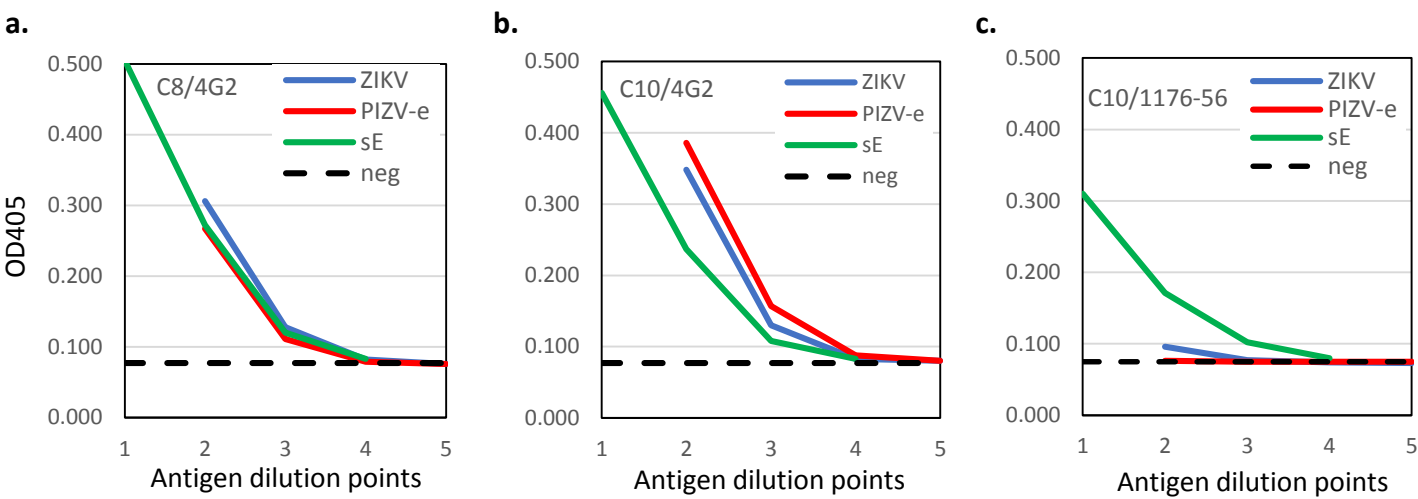

**d.**

| Antigen input/well                    | Antigen dilution points (10-fold) |      |       |        |      |
|---------------------------------------|-----------------------------------|------|-------|--------|------|
|                                       | 1                                 | 2    | 3     | 4      | 5    |
| ZIKV ( $\log_{10} \text{TCID}_{50}$ ) | nd                                | 6.83 | 5.83  | 4.83   | 3.83 |
| PIZV-e ( $\mu\text{g}$ )              | nd                                | 0.60 | 0.060 | 0.0060 | nd   |
| sE ( $\mu\text{g}$ )                  | 5.6                               | 0.56 | 0.056 | 0.0056 | nd   |

**Supplementary Fig. S1a-d. Sandwich ELISA.** Serially diluted antigens (10-fold) were captured by EDE C8 or EDE C10, and detected by either 4G2 or 1176-56. (a) EDE C8/4G2 (b) EDE C10/4G2 (c) EDE C10/1176-56. (d) Antigen input amount for each dilution. Positive cutoff (shaded in grey) was set at OD405 > negative control OD average (from 6 replicates) +6xSD. Shaded areas indicate an antigen input amount that resulted in a positive result for panels a and b only. For panel C, only sE was detectable by 1176-56.

a.

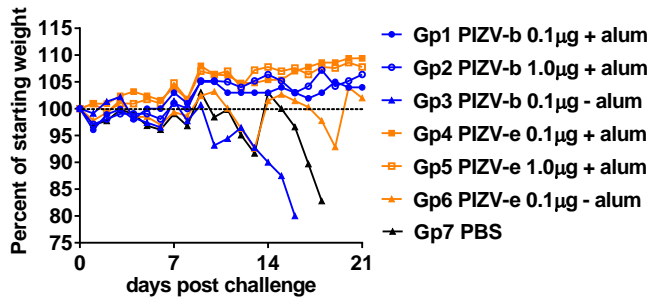

b.

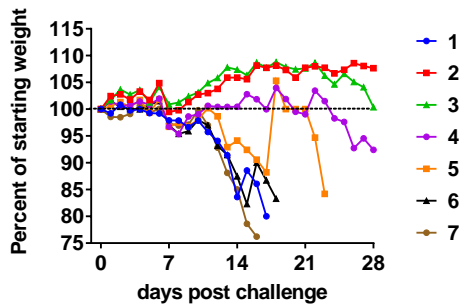

**Supplementary Fig. S2a-b. Average weight of AG129 test groups post-challenge.** (a) immunogenicity and efficacy study (b) passive immunization study. Average weights are represented as a percentage of starting weight.
